# Supplementary material for: Photocatalytic degradation of methylene blue with hematite nanoparticles synthesized by thermal decomposition of fluoroquinolones oxalato–iron(iii) complexes
Source: Royal Society of Chemistry journal article supplement (doi:10.1039/c5ra12157d), 2015-01-01
Supplement: c5ra12157d1.pdf [file c5ra12157d1.pdf]

**Photocatalytic degradation of methylene blue with hematite nanoparticles synthesized by thermal decomposition of fluoroquinolones oxalato-iron(III) complexes**

Ahmed M. Mansour\*

Chemistry Department, Faculty of Science, Cairo University, Gamaa Street, Giza 12613, Egypt

Supporting Information

**E-mail:** mansour@sci.cu.edu.eg; inorganic\_am@yahoo.com

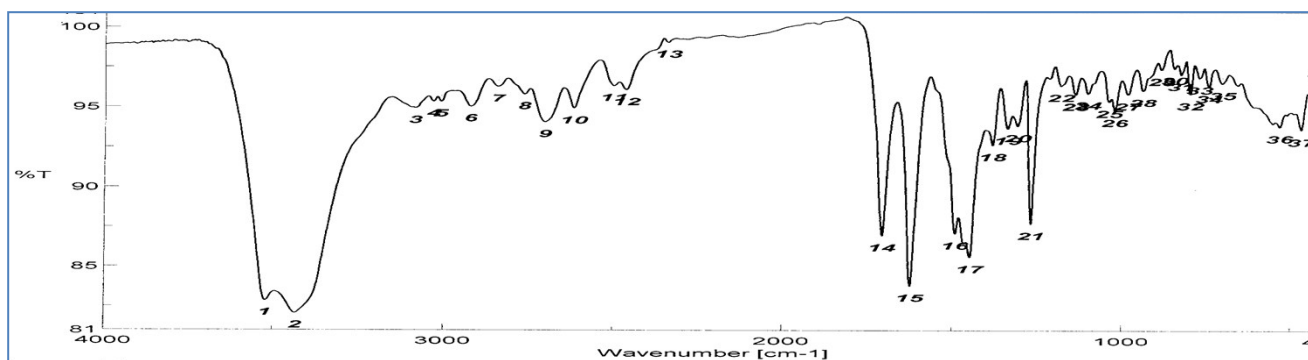

a)

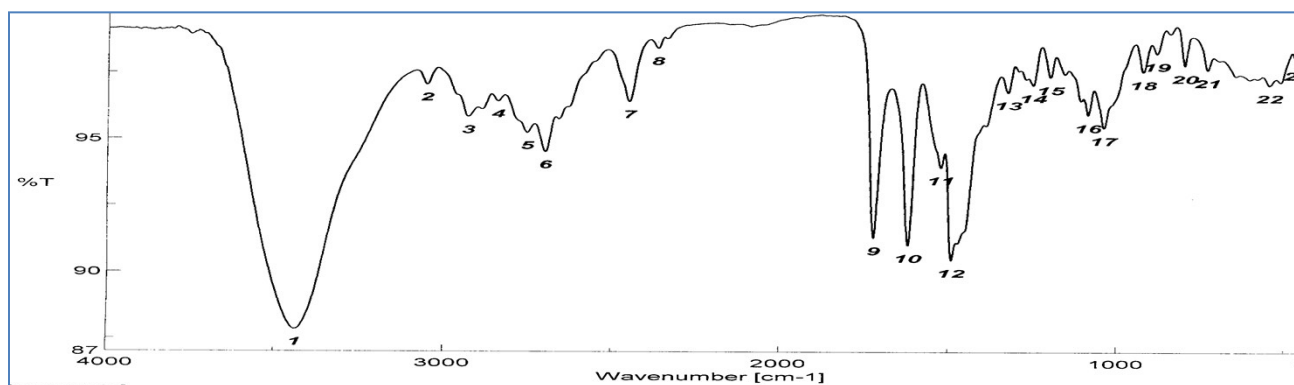

b)

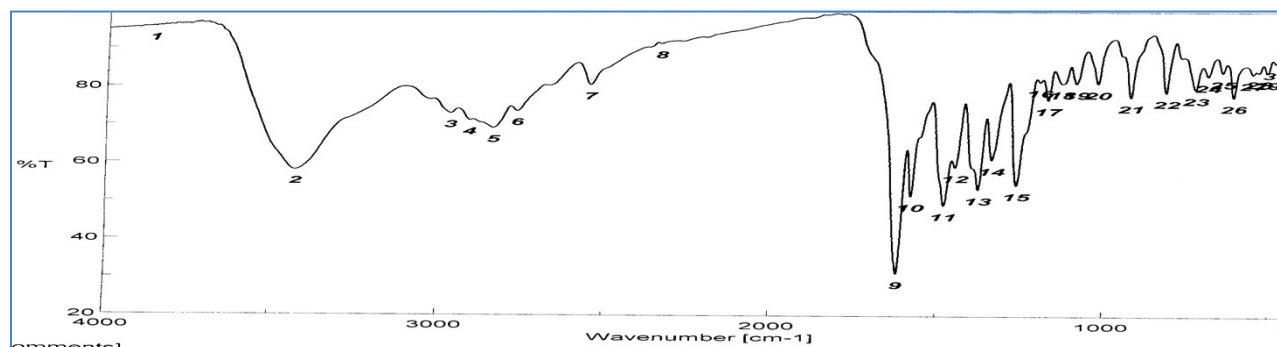

c)

**Fig. S1:** Experimental FT IR spectra of a) ciprofloxacin·HCl, b) lomefloxacin·HCl and c) norfloxacin.

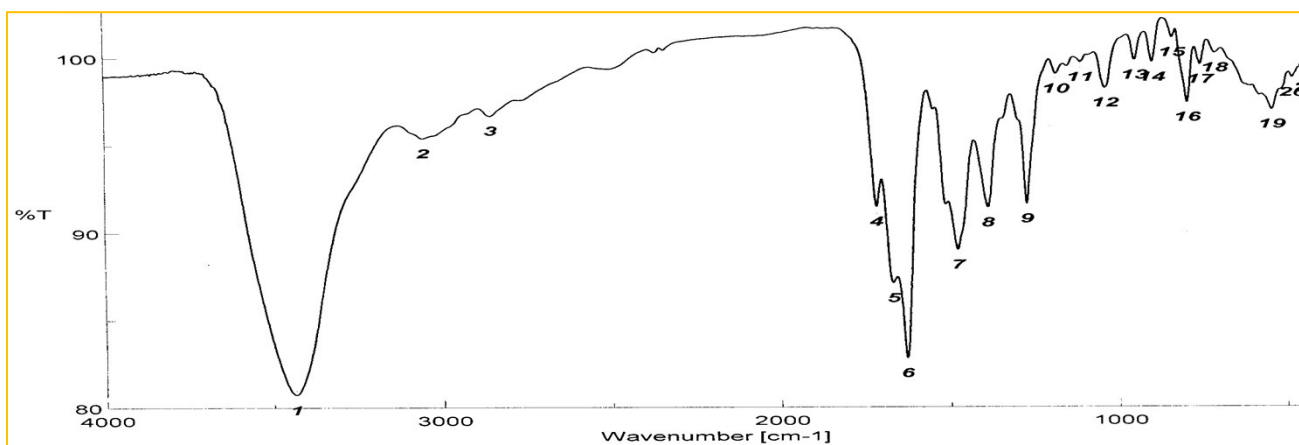

a)

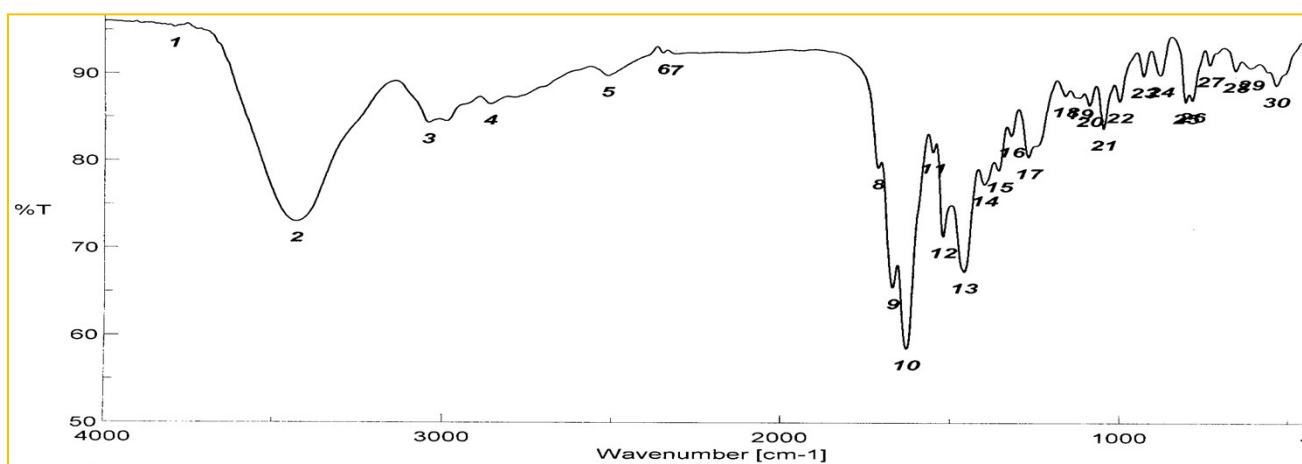

b)

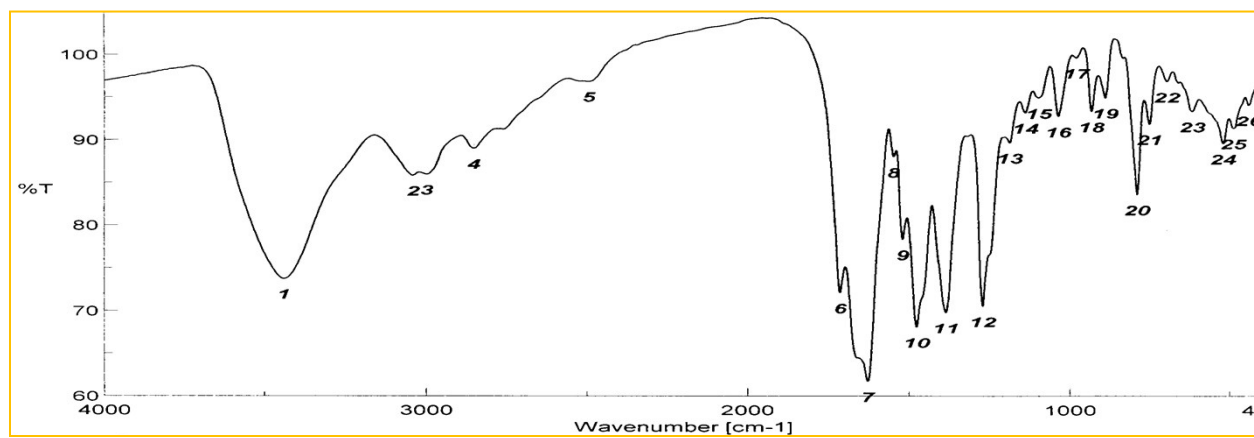

c)

**Fig. S2:** Experimental FT IR spectra of complexes a) 1, b) 2 and c) 3.

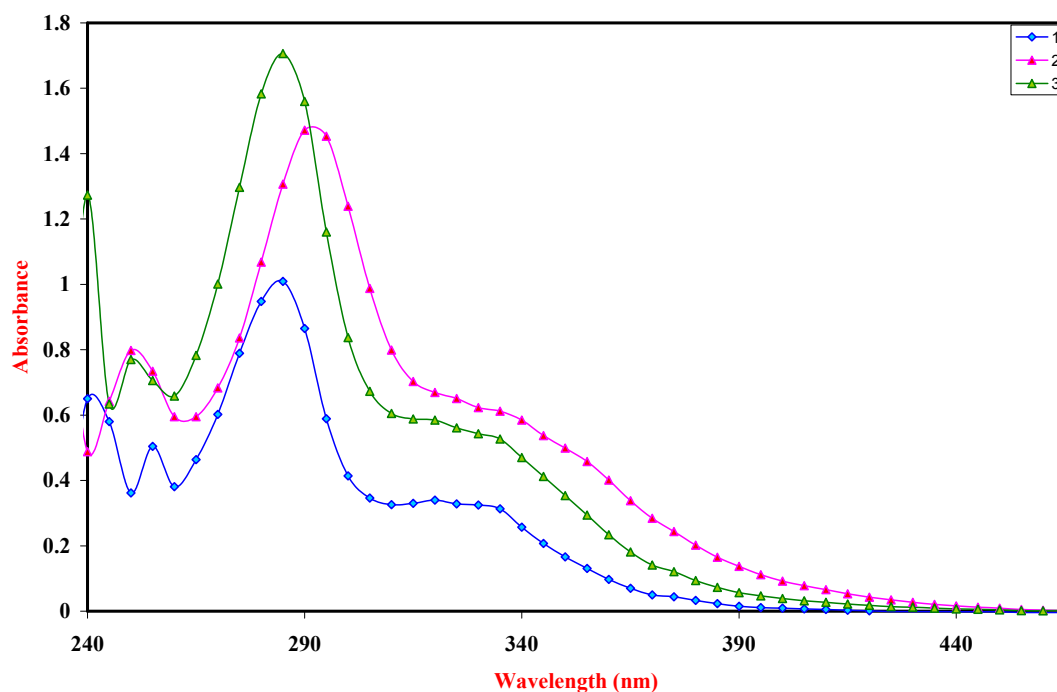

**Fig. S3:** Experimental electronic absorption spectra of the investigated complexes in DMSO.

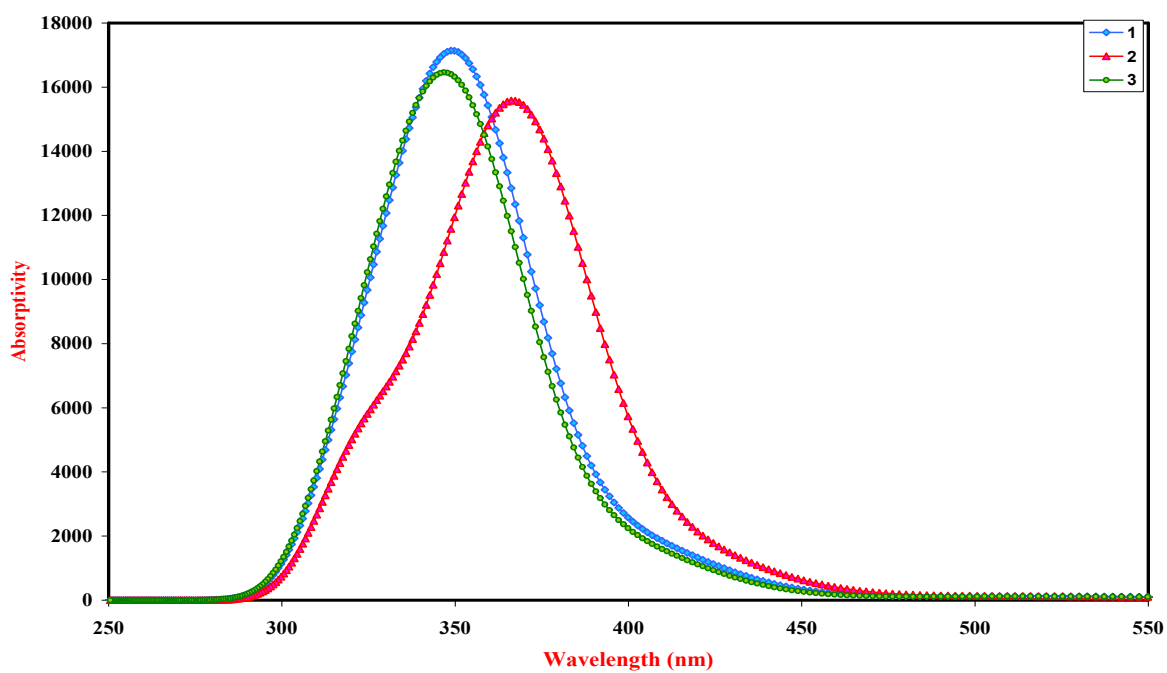

**Fig. S4:** Theoretical TD-DFT spectra of the investigated complexes in DMSO calculated at DFT/B3LYP/6-31G(d) level of theory.

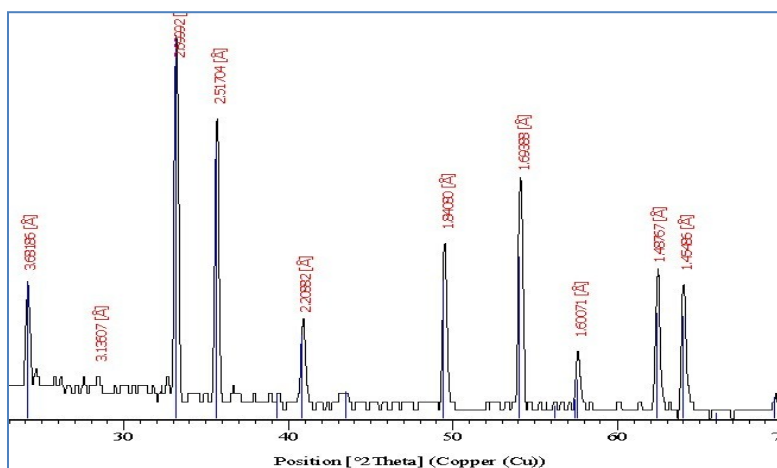

a)

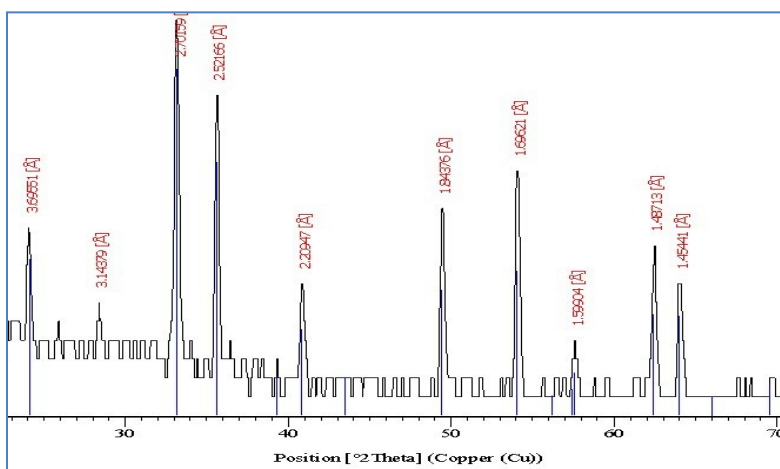

b)

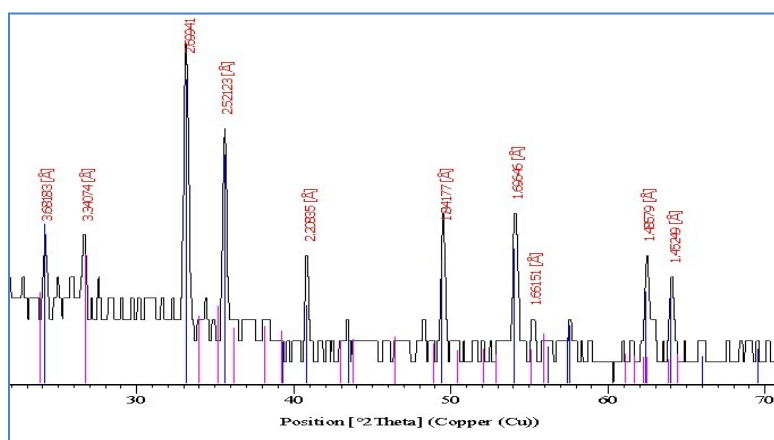

c)

**Fig. S5:** XRD patterns of nano-hematite obtained from the controlled thermal decomposition of complexes a) **1**, b) **2** and c) **3**.

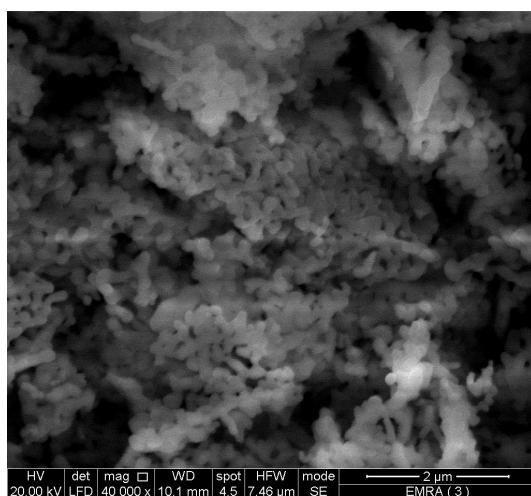

a)

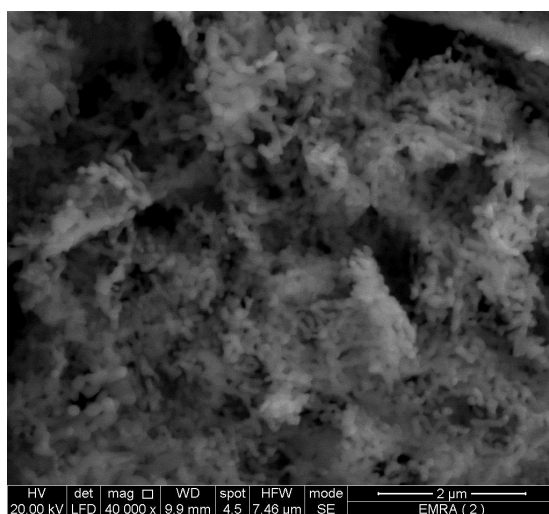

c)

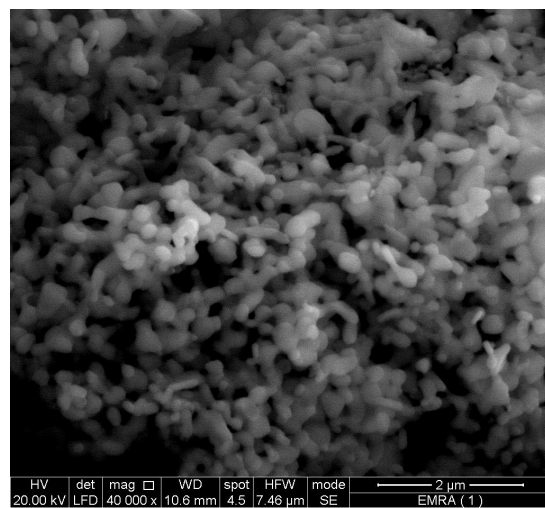

**Fig. S6:** FE-SEM images of  $\alpha$ -Fe<sub>2</sub>O<sub>3</sub> nanoparticles obtained from thermal decomposition of a) 1, b) 2 and c) 3 by magnification of 40 000x.

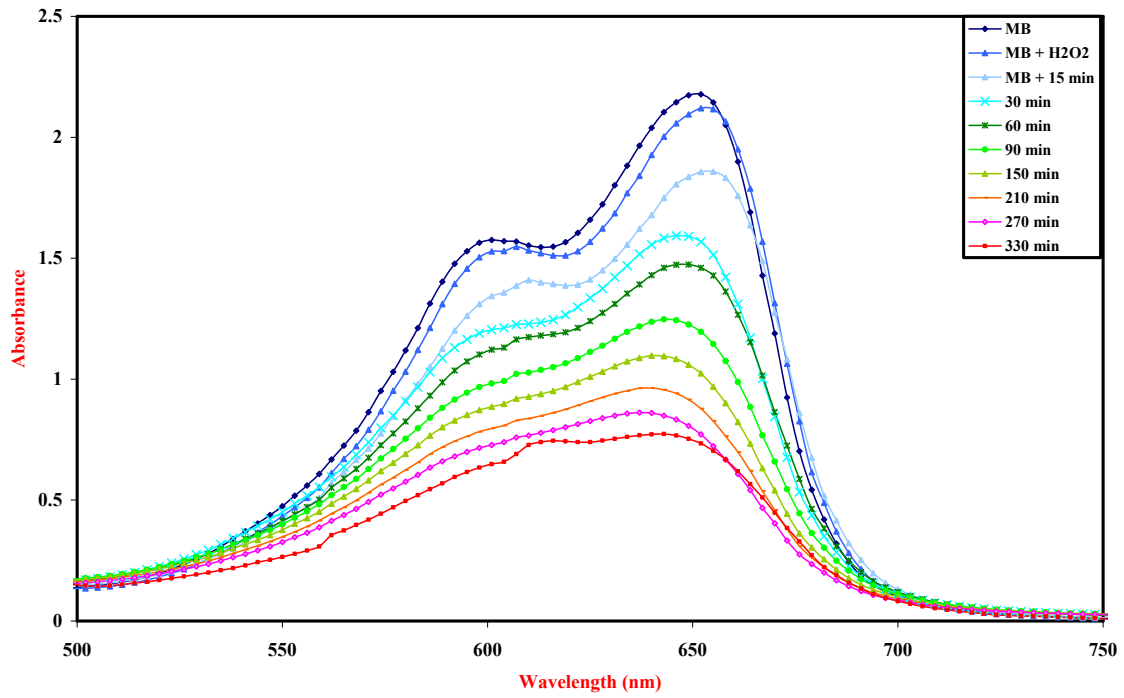

**Fig. S7:** Absorption spectral changes and photo-degradation of MB by H<sub>2</sub>O<sub>2</sub> under the effect of UV light at 365 nm (Control experiment).

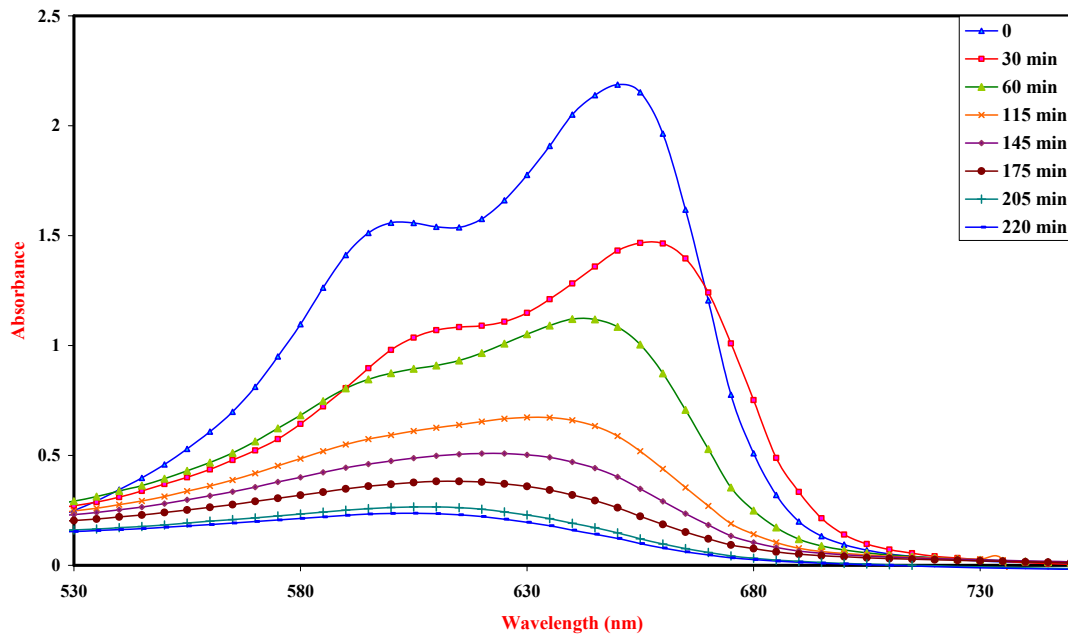

**Fig. S8:** Absorption spectral changes and photo-degradation of MB by H<sub>2</sub>O<sub>2</sub> in presence of hematite nanoparticles No. 1 under the effect of UV light at 365 nm.

**Table S1:** Second-order interaction energy ( $E^2$ , kcal/mol) between donor and acceptor orbitals in the studied complexes 1-3 calculated at DFT/B3LYP/6-31G(d) level of theory (selected)

| <b>Donor</b> → <b>Acceptor</b> | $E^2$ (kcal/mol) |          |          |
|--------------------------------|------------------|----------|----------|
|                                | <b>1</b>         | <b>2</b> | <b>3</b> |
| LP(3)O2→RY*(3)Fe               | 1.07             | 1.08     | 1.08     |
| LP(2)O3→RY*(4)Fe               | 0.72             | 0.70     | 0.69     |
| LP(3)O4→RY*(2)Fe               | 1.27             | 1.28     | 1.27     |
| LP(2)O5→RY*(3)Fe               | 1.33             | 1.33     | 1.33     |
| LP(2)O6→RY*(4)Fe               | 0.89             | 0.91     | 0.90     |
| LP(3)O7→RY*(2)Fe               | 1.32             | 1.33     | 1.32     |
